# Supplementary material
Source: Springer Nature journal article supplement (https://www.springermedizin.de/resource/supplementary/12914_2013_319_MOESM3_ESM.pdf/9537212)

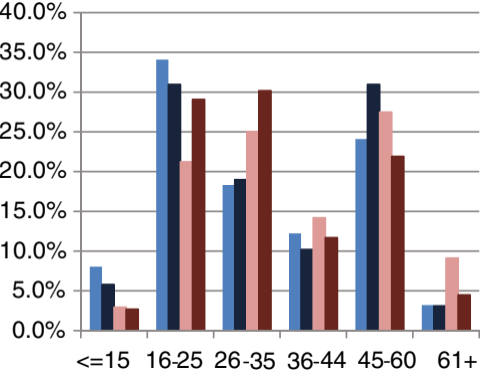

■ Abhoynagar (N=605)  
Women (N=311)

■ Abhoynagar (N=605)  
Husbands (N=294)

■ Mirsarai (N=504)  
Women (N=240)

■ Mirsarai (N=504)  
Husbands (N=264)

Supplement: MOESM3 [file 9537212]
